# Supplementary material for: Molecular rotators anchored on a rod-like anionic coordination polymer adhered by charge-assisted hydrogen bonds
Source: Royal Society of Chemistry journal article supplement (doi:10.1039/d3cp05597c), 2023-12-30
Supplement: d3cp05597c1.pdf [file d3cp05597c1.pdf]

## Electronic Supplementary Information

for

### **Molecular rotators anchored on rod-like anionic coordination polymer adhered by charge-assisted hydrogen bond**

Hui Xiao,<sup>a</sup> Wei-Yu Hu,<sup>a</sup> Qing Wang,<sup>b</sup> Cheng-Hui Zeng,<sup>a</sup> Hao-Hong Li,<sup>c</sup> Haiming Liu,<sup>b</sup> Zi-Yi Du<sup>a,\*</sup> and Chun-Ting He<sup>a</sup>

<sup>a</sup>*College of Chemistry and Chemical Engineering, Jiangxi Normal University, Nanchang 330022, China*

<sup>b</sup>*School of Physical Science and Technology, ShanghaiTech University, Shanghai 201210, China*

<sup>c</sup>*College of Chemistry, Fuzhou University, Fuzhou 350108, China*

*\*Correspondence to: Zi-Yi Du, E-mail: ziyidu@gmail.com*

**Table S1** Summary of crystal data and structural refinements for **1** at different temperatures

| Empirical formula                                                                        | C <sub>5</sub> H <sub>14</sub> NBr <sub>3</sub> Cd (FW = 440.30) |                |                |                |                |                |
|------------------------------------------------------------------------------------------|------------------------------------------------------------------|----------------|----------------|----------------|----------------|----------------|
| Temperature (K)                                                                          | 173(2)                                                           | 203(2)         | 233(2)         | 273(2)         | 293(2)         | 313(2)         |
| Space group                                                                              | P2 <sub>1</sub> /n                                               |                |                |                |                |                |
| <i>a</i> (Å)                                                                             | 7.5549(2)                                                        | 7.5782(2)      | 7.6022(3)      | 7.6240(3)      | 7.6369(3)      | 7.6486(4)      |
| <i>b</i> (Å)                                                                             | 16.4113(6)                                                       | 16.4426(6)     | 16.4869(7)     | 16.5760(8)     | 16.6462(8)     | 16.7161(1)     |
| <i>c</i> (Å)                                                                             | 9.6428(3)                                                        | 9.6674(3)      | 9.6894(4)      | 9.7148(4)      | 9.7245(4)      | 9.7365(5)      |
| <i>V</i> /Å <sup>3</sup>                                                                 | 1176.06(7)                                                       | 1184.39(7)     | 1193.67(9)     | 1206.82(9)     | 1215.46(9)     | 1224.93(1)     |
| <i>Z</i>                                                                                 | 4                                                                |                |                |                |                |                |
| <i>D</i> <sub>calcd</sub> /g cm <sup>-3</sup>                                            | 2.487                                                            | 2.469          | 2.450          | 2.423          | 2.406          | 2.388          |
| $\mu$ /mm <sup>-1</sup>                                                                  | 11.995                                                           | 11.910         | 11.818         | 11.689         | 11.606         | 11.516         |
| GOF on F <sup>2</sup>                                                                    | 1.052                                                            | 1.066          | 1.045          | 1.059          | 1.061          | 1.043          |
| <i>R</i> <sub>1</sub> , <i>wR</i> <sub>2</sub> [ <i>I</i> > 2σ( <i>I</i> )] <sup>a</sup> | 0.0288, 0.0615                                                   | 0.0304, 0.0654 | 0.0384, 0.0850 | 0.0378, 0.0855 | 0.0419, 0.0947 | 0.0493, 0.1417 |
| <i>R</i> <sub>1</sub> , <i>wR</i> <sub>2</sub> (all data)                                | 0.0374, 0.0636                                                   | 0.0500, 0.0690 | 0.0556, 0.0895 | 0.0669, 0.0938 | 0.0655, 0.1018 | 0.0835, 0.1589 |
| Refined content for N1-containing cation <sup>b</sup>                                    | 1.000                                                            | 0.824          | 0.747          | 0.688          | 0.645          | 0.632          |

$$^a R_1 = \sum ||F_o| - |F_c|| / \sum |F_o|, wR_2 = \{\sum w[(F_o)^2 - (F_c)^2]^2 / \sum w[(F_o)^2]^2\}^{1/2}$$

<sup>b</sup>The N1/N1'-containing (*i*-PrNHMe<sub>2</sub>)<sup>+</sup> cation displays two-fold disorder during the structural refinement.

**Table S2** Selected bond lengths (Å) for **1** at different temperatures

|           |           |           |           |
|-----------|-----------|-----------|-----------|
| 173 K     |           |           |           |
| Cd1–Br1   | 2.5989(4) | Cd1–Br2   | 2.6076(5) |
| Cd1–Br3   | 2.5758(4) | Cd1–Br1#1 | 2.9696(5) |
| Cd1–Br2#2 | 2.8773(4) |           |           |
| 203 K     |           |           |           |
| Cd1–Br1   | 2.5971(5) | Cd1–Br2   | 2.6056(5) |
| Cd1–Br3   | 2.5770(5) | Cd1–Br1#1 | 2.9728(5) |
| Cd1–Br2#3 | 2.8854(5) |           |           |
| 233 K     |           |           |           |
| Cd1–Br1   | 2.5961(6) | Cd1–Br2   | 2.6036(6) |
| Cd1–Br3   | 2.5754(6) | Cd1–Br1#1 | 2.9772(6) |
| Cd1–Br2#3 | 2.8950(6) |           |           |
| 273 K     |           |           |           |
| Cd1–Br1   | 2.5938(6) | Cd1–Br2   | 2.6011(6) |
| Cd1–Br3   | 2.5755(6) | Cd1–Br1#1 | 2.9806(7) |
| Cd1–Br2#3 | 2.9084(6) |           |           |
| 293 K     |           |           |           |
| Cd1–Br1   | 2.5928(7) | Cd1–Br2   | 2.6000(7) |
| Cd1–Br3   | 2.5732(7) | Cd1–Br1#1 | 2.9851(8) |
| Cd1–Br2#3 | 2.9159(7) |           |           |
| 313 K     |           |           |           |
| Cd1–Br1   | 2.591(1)  | Cd1–Br2   | 2.5951(9) |
| Cd1–Br3   | 2.572(1)  | Cd1–Br1#1 | 2.987(1)  |
| Cd1–Br2#3 | 2.9269(9) |           |           |

Symmetry codes: #1.  $1 - x, 1 - y, 1 - z$ ; #2.  $-x, 1 - y, 1 - z$ ; #3.  $2 - x, 1 - y, 1 - z$ .**Table S3** The hydrogen-bond geometries (Å, °) for **1** at different temperatures

|       | D–H⋯A       | D–H       | H⋯A       | D⋯A       | Angle    |
|-------|-------------|-----------|-----------|-----------|----------|
| 173 K | N1–H1⋯Br3   | 0.9999(3) | 2.4619(4) | 3.3572(3) | 148.8(2) |
| 203 K | N1–H1⋯Br3   | 0.9802(5) | 2.4744(4) | 3.3509(6) | 148.7(3) |
|       | N1'–H1'⋯Br3 | 0.9793(3) | 2.4231(4) | 2.3324(3) | 154.3(1) |
| 233 K | N1–H1⋯Br3   | 0.9803(7) | 2.4601(4) | 3.3440(8) | 149.8(4) |
|       | N1'–H1'⋯Br3 | 0.9822(2) | 2.4222(4) | 3.3252(2) | 152.6(1) |
| 273 K | N1–H1⋯Br3   | 0.9798(8) | 2.4582(5) | 3.3427(1) | 150.0(5) |
|       | N1'–H1'⋯Br3 | 0.9802(2) | 2.3961(5) | 3.3220(2) | 157.3(1) |
| 293 K | N1–H1⋯Br3   | 0.9820(2) | 2.4471(6) | 3.3346(1) | 151.4(6) |
|       | N1'–H1'⋯Br3 | 0.9792(1) | 2.4389(6) | 3.3555(3) | 155.1(1) |
| 313 K | N1–H1⋯Br3   | 0.9790(1) | 2.4267(7) | 3.3211(1) | 151.7(8) |
|       | N1'–H1'⋯Br3 | 0.9789(2) | 2.4423(7) | 3.3554(3) | 155.1(2) |

**Table S4** The fitted parameters with Debye equation for **1** at 150 ~ 230 K

| $T$ (K) | $\tau_0$ (s)         | $\epsilon_0$ | $\epsilon_\infty$ | $\Delta\epsilon$ |
|---------|----------------------|--------------|-------------------|------------------|
| 150     | $1.0 \times 10^{-4}$ | 3.39         | 3.21              | 0.18             |
| 160     | $3.9 \times 10^{-5}$ | 3.44         | 3.23              | 0.21             |
| 170     | $1.5 \times 10^{-5}$ | 3.48         | 3.25              | 0.23             |
| 180     | $7.7 \times 10^{-6}$ | 3.53         | 3.28              | 0.25             |
| 190     | $3.5 \times 10^{-6}$ | 3.58         | 3.30              | 0.28             |
| 200     | $1.8 \times 10^{-6}$ | 3.62         | 3.33              | 0.29             |
| 210     | $1.0 \times 10^{-6}$ | 3.68         | 3.37              | 0.31             |
| 220     | $5.4 \times 10^{-7}$ | 3.74         | 3.41              | 0.33             |
| 230     | $3.8 \times 10^{-7}$ | 3.81         | 3.45              | 0.36             |

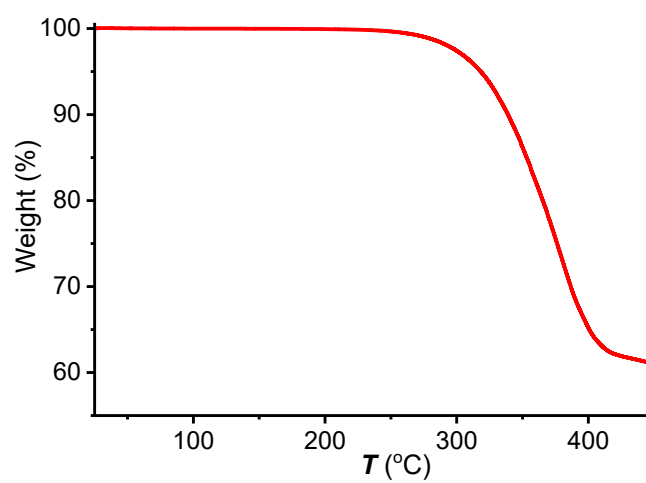

**Fig. S1** TGA curve of **1**.

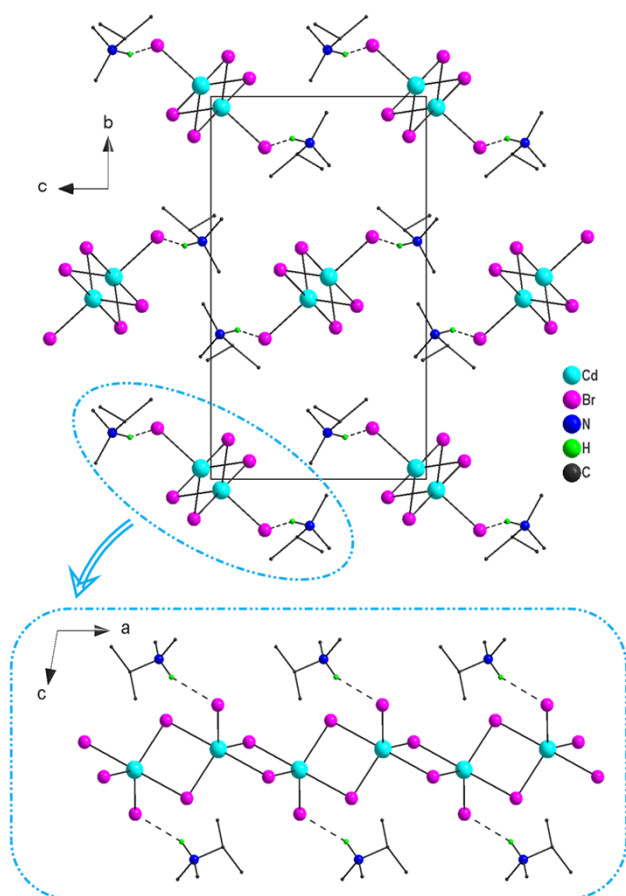

**Fig. S2** View of the structure of **1** at 173 K.

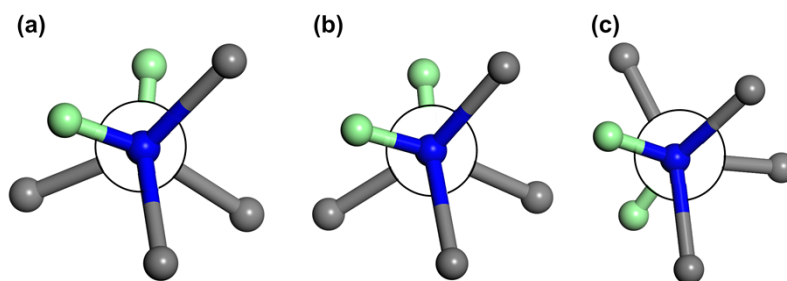

**Fig. S3** Newman projections of the N1-containing (*i*-PrNHMe<sub>2</sub>)<sup>+</sup> ion at 173 K (a), 313 K (b), and the N1'-containing one (c) along the N-C bond.

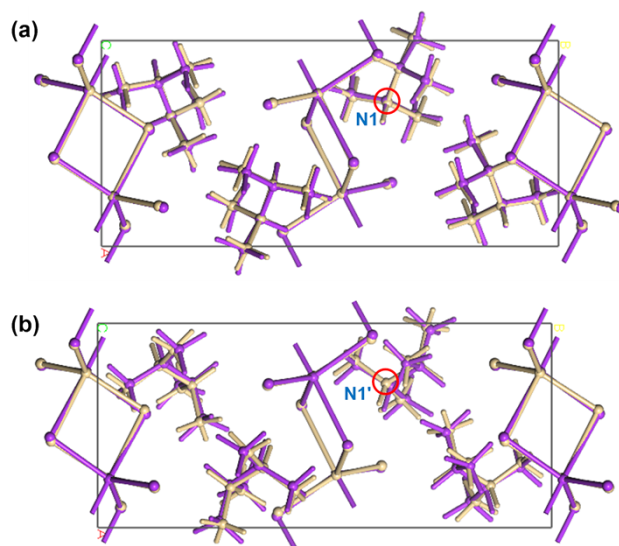

**Fig. S4** Overlapping maps of the crystal structures of **1** (at 313 K) before/after geometry optimization (shaded in yellow/purple, respectively), with merely the N1-containing (*i*-PrNHMe<sub>2</sub>)<sup>+</sup> cations (a) or merely the N1'-containing ones (b).

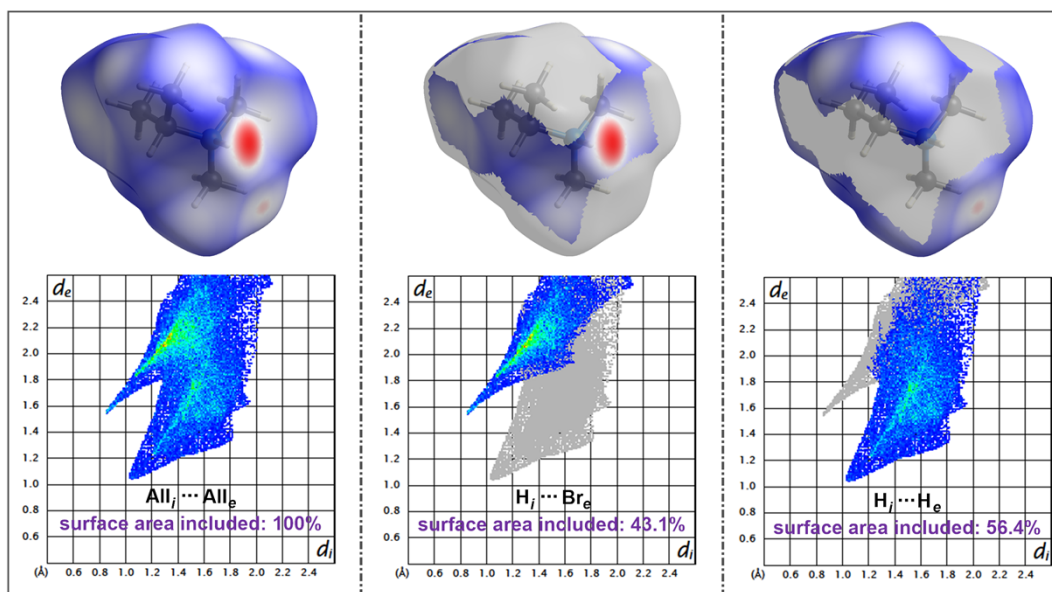

**Fig. S5** Above: Views of the Hirshfeld surface (mapped with  $d_{\text{norm}}$ ) of the N1-containing (*i*-PrNHMe<sub>2</sub>)<sup>+</sup> cation in **1** at 313 K, indicating the relative strength of the intermolecular interactions surrounding the (*i*-PrNHMe<sub>2</sub>)<sup>+</sup> cation. The red, white, and blue regions represent molecular contacts shorter than, equal to, and longer than the van der Waals distance, respectively. Below: 2D fingerprint plots showing atomic contacts to the Hirshfeld surface of the N1-containing (*i*-PrNHMe<sub>2</sub>)<sup>+</sup> cation in **1** at 313 K, where  $d_i$  and  $d_e$  denote the distances from the surface to the nearest atom interior and exterior to the surface, respectively. The 2D plots were created by binning ( $d_e$ ,  $d_i$ ) pairs and coloring each bin of the resulting 2D histogram as a function of the fraction of surface points in that bin, ranging from blue (few points) through green to red (many points).

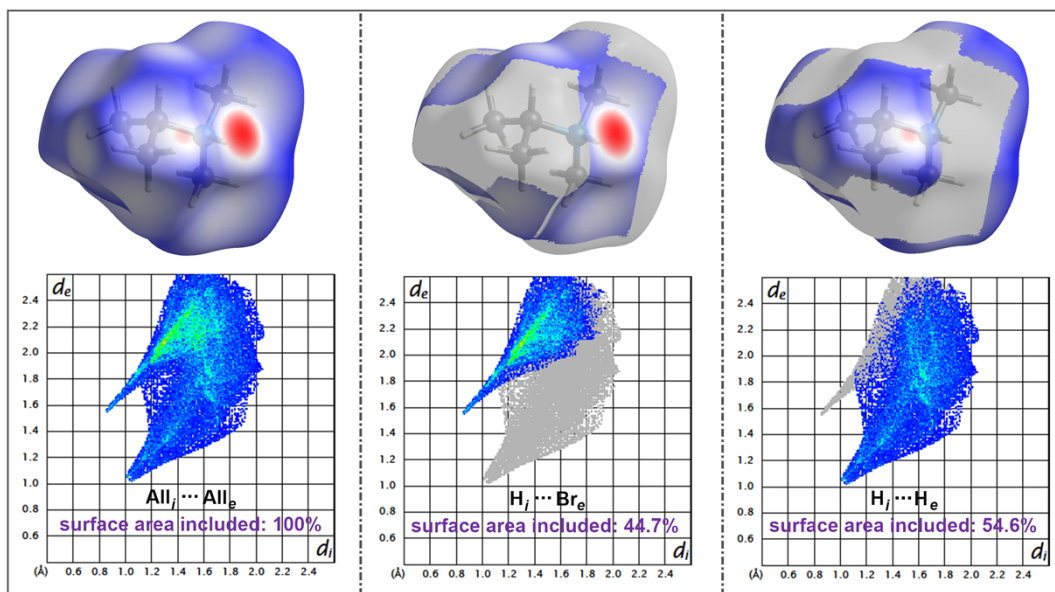

**Fig. S6** Above: Views of the Hirshfeld surface (mapped with  $d_{\text{norm}}$ ) of the N1'-containing (*i*-PrNHMe<sub>2</sub>)<sup>+</sup> cation in **1** at 313 K. Below: 2D fingerprint plots showing atomic contacts to the Hirshfeld surface of the N1'-containing (*i*-PrNHMe<sub>2</sub>)<sup>+</sup> cation in **1** at 313 K. For display details, see the figure caption of Fig. S5.

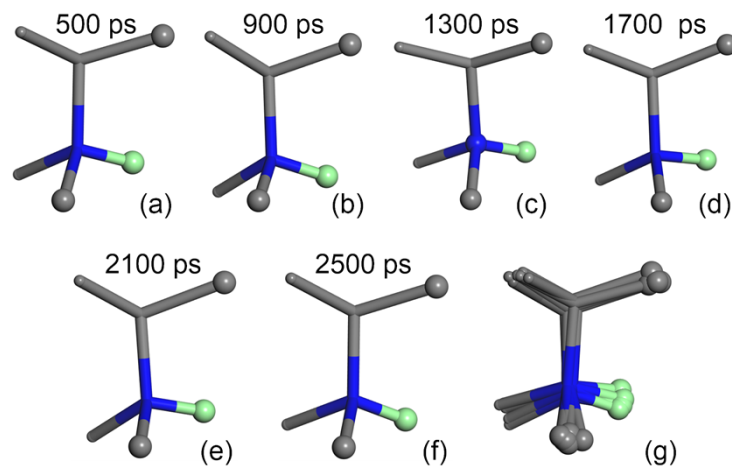

**Fig. S7** Snapshots of NVT dynamic simulation for the (*i*-PrNHMe<sub>2</sub>)<sup>+</sup> cation of **1** at  $T_s$  of 173 K (a-f), and the overlapping maps of these snapshots (g), to display their dynamics. The specified H and C atoms are highlighted by balls to guide the eye.

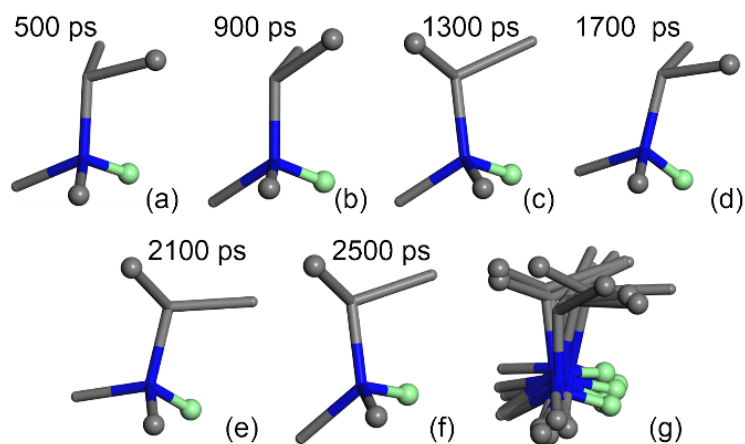

**Fig. S8** Snapshots of NVT dynamic simulation for the (*i*-PrNHMe<sub>2</sub>)<sup>+</sup> cation of **1** at  $T_S$  of 373 K (a-f), and the overlapping maps of these snapshots (g), to display their dynamics. The specified H and C atoms are highlighted by balls to guide the eye.

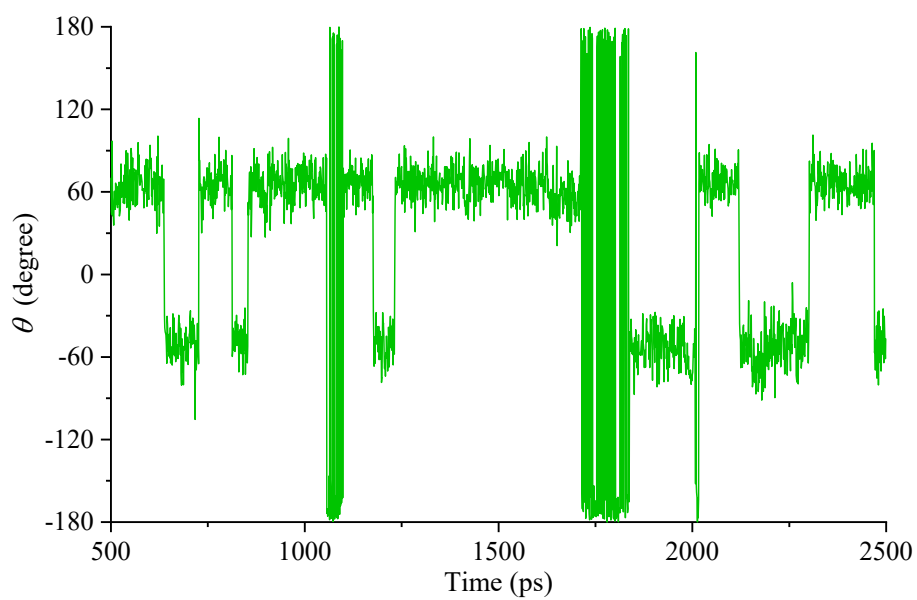

**Fig. S9** The evolution of the torsion  $\vartheta$  over simulation time from 500 to 2500 ps, at  $T_S$  of 373 K.



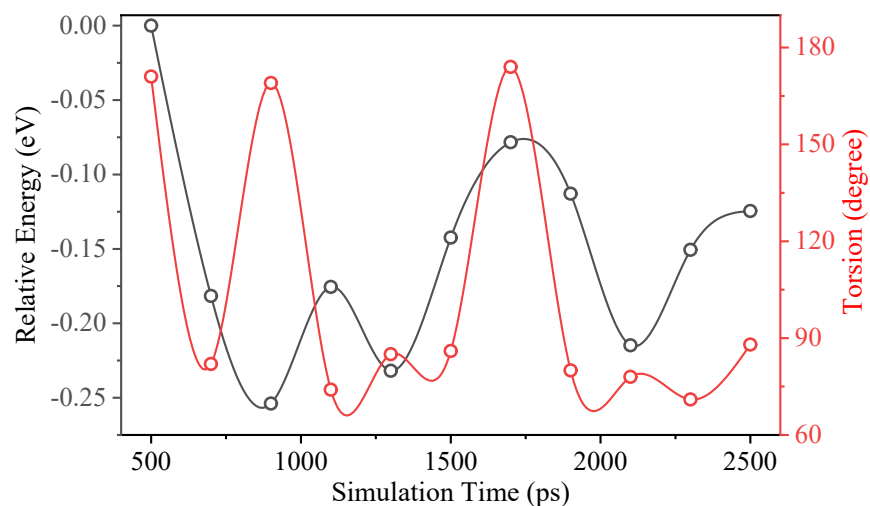

**Fig. S10** Variations of the relative potential energy for **1** (based on DFT calculation) and the torsion  $\vartheta_{(H-N-C-H)}$  of one selected (*i*-PrNHMe<sub>2</sub>)<sup>+</sup> ion during the MD simulation process (at  $T_s$  of 373 K), over the simulation time from 500 to 2500 ps (in an increasing step of 200 ps).

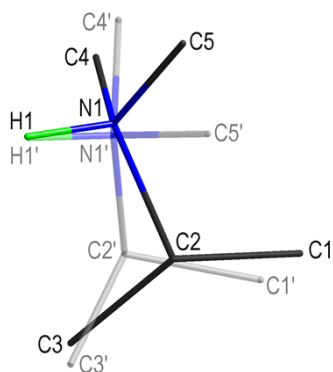

**Fig. S11** The two-fold disordered states of the (*i*-PrNHMe<sub>2</sub>)<sup>+</sup> ion in the crystal structure of **1** at 313K.

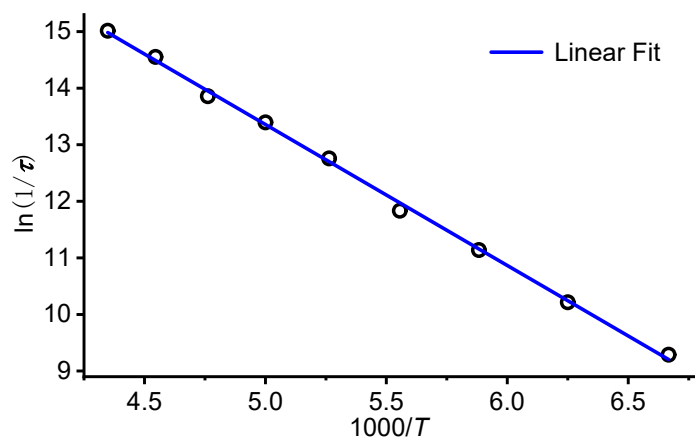

**Fig. S12** Arrhenius plot of the relaxation time  $\tau$  as a function of inverse temperature for a single relaxation process of **1**.

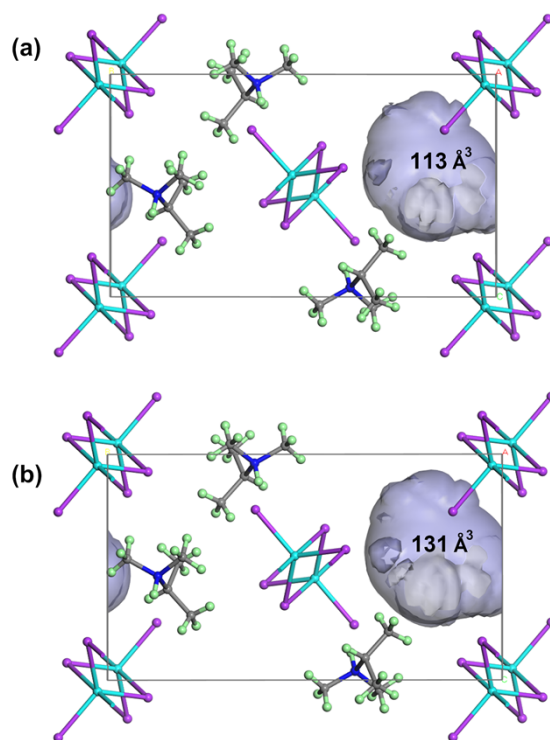

**Fig. S13** Variable confined space for the  $(i\text{-PrNHMe}_2)^+$  cations at 173 K (a) and 313 K (b), respectively. Cd, N, C, and H atoms are shaded in cyan, blue, grey, and green, respectively.

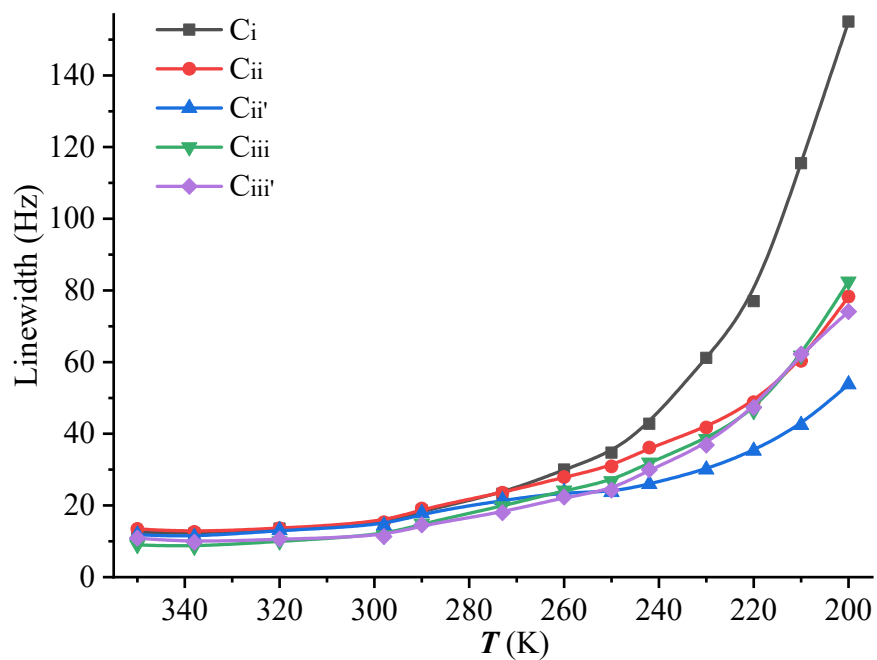

**Fig. S14** Temperature-dependent linewidth for the  $(i\text{-PrNHMe}_2)^+$  ion in **1**.

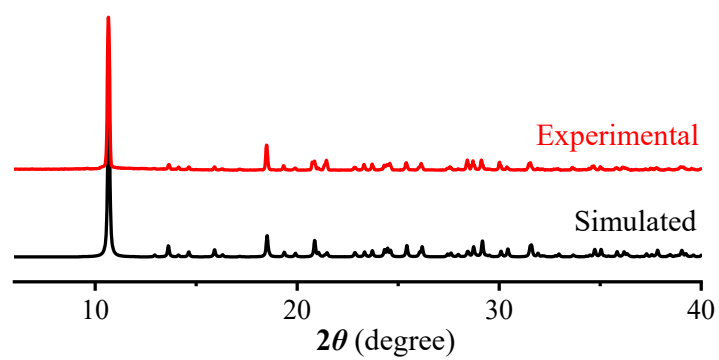

**Fig. S15** Simulated and experimental PXRD patterns for **1** at 293 K.
